# Supplementary material
Source: publisher figshare collection journal article supplement (https://geolsoc.figshare.com/articles/dataset/_/3453602)
Supplement: Supplementary file 2 [file 1]

| Trace mode - ppm |              |       |        |      |       |        |      |       |      |      |      |      |
|------------------|--------------|-------|--------|------|-------|--------|------|-------|------|------|------|------|
|                  |              | S     | Ca     | Ti   | Cr    | Fe     | Co   | Ni    | Cu   | Zn   | As   | Sr   |
| DRD738           | Average conc | 5705  | 129594 | 3259 | 458   | 176256 | 72   | 842   | 269  | 177  | 47   | 39   |
|                  | SD           | 515   | 1257   | 59   | 59    | 1226   | 1    | 38    | 3    | 6    | 1    | 1    |
|                  | RSD          | 9.0   | 1.0    | 1.8  | 12.9  | 0.7    | 1.9  | 4.6   | 1.1  | 3.4  | 2.5  | 3.8  |
|                  | P            | 18.1  | 1.9    | 3.6  | 25.8  | 1.4    | 3.9  | 9.1   | 2.2  | 6.9  | 5.0  | 7.5  |
| UMI-08-028       | Average conc | 26854 | 54680  | 2794 | 904   | 179406 | 95   | <DL   | 890  | 3797 | 51   | 29   |
|                  | SD           | 900   | 225    | 28   | 116   | 301    | 4    |       | 9    | 9    | 3    | 1    |
|                  | RSD          | 3.3   | 0.4    | 1.0  | 12.9  | 0.2    | 4.1  |       | 1.0  | 0.2  | 5.3  | 3.0  |
|                  | P            | 6.7   | 0.8    | 2.0  | 25.8  | 0.3    | 8.2  |       | 1.9  | 0.5  | 10.6 | 5.9  |
| UMI-07-054       | Average conc | 1057  | 119836 | 8386 | 1784  | 151410 | 58   | 207   | 18   | 200  | 44   | 405  |
|                  | SD           | 251   | 791    | 63   | 230   | 1052   | 1    | 24    | 3    | 3    | 2    | 4    |
|                  | RSD          | 23.8  | 0.7    | 0.7  | 12.9  | 0.7    | 2.4  | 11.4  | 19.0 | 1.7  | 3.5  | 0.9  |
|                  | P            | 47.5  | 1.3    | 1.5  | 25.8  | 1.4    | 4.8  | 22.9  | 38.0 | 3.4  | 7.0  | 1.8  |
| MID024           | Average conc | 11787 | 79414  | 1241 | 3521  | 145298 | 76   | 16532 | 533  | 134  | 345  | 27   |
|                  | SD           | 291   | 427    | 37   | 453   | 534    | 1    | 139   | 15   | 8    | 4    | 1    |
|                  | RSD          | 2.5   | 0.5    | 3.0  | 12.9  | 0.4    | 1.6  | 0.8   | 2.8  | 5.9  | 1.2  | 5.2  |
|                  | P            | 4.9   | 1.1    | 6.0  | 25.8  | 0.7    | 3.2  | 1.7   | 5.7  | 11.8 | 2.4  | 10.3 |
| DRD102           | Average conc | 1757  | 116068 | 4084 | 6951  | 76759  | 39   | <DL   | 78   | 150  | 53   | 81   |
|                  | SD           | 272   | 709    | 39   | 895   | 513    | 2    |       | 2    | 6    | 2    | 2    |
|                  | RSD          | 15.5  | 0.6    | 1.0  | 12.9  | 0.7    | 5.2  |       | 2.0  | 3.9  | 4.0  | 2.0  |
|                  | P            | 31.0  | 1.2    | 1.9  | 25.8  | 1.3    | 10.5 |       | 3.9  | 7.8  | 8.0  | 4.1  |
| MID046           | Average conc | 16412 | 14515  | 3128 | 13719 | 79657  | 45   | <DL   | 659  | 1880 | 32   | 21   |
|                  | SD           | 335   | 64     | 37   | 1767  | 585    | 1    |       | 5    | 9    | 2    | 0    |
|                  | RSD          | 2.0   | 0.4    | 1.2  | 12.9  | 0.7    | 3.2  |       | 0.8  | 0.5  | 6.4  | 1.7  |
|                  | P            | 4.1   | 0.9    | 2.3  | 25.8  | 1.5    | 6.4  |       | 1.6  | 1.0  | 12.8 | 3.5  |
| Major mode - %   |              |       |        |      |       |        |      |       |      |      |      |      |
|                  |              | Mg    | Si     | S    | Ca    | Ti     | Cr   | Fe    | Co   | Ni   | Cu   | Zn   |
| DRD738           | Average conc | 2.25  | 23.69  | 0.86 | 11.56 | 0.31   | 0.03 | 14.45 | 0.00 | 0.09 | 0.03 | 0.02 |
|                  | SD           | 0.58  | 0.64   | 0.01 | 0.05  | 0.02   | 0.01 | 0.03  | <DL  | 0.00 | 0.00 | 0.00 |
|                  | RSD          | 25.6  | 2.7    | 1.2  | 0.4   | 6.7    | 17.9 | 0.2   |      | 4.6  | 2.2  | 6.4  |
|                  | P            | 51.3  | 5.4    | 2.4  | 0.8   | 13.5   | 35.8 | 0.4   |      | 9.2  | 4.4  | 12.8 |
| UMI-08-028       | Average conc | 1.35  | 18.92  | 5.95 | 5.33  | 0.24   | 0.00 | 13.48 | 0.02 | <DL  | 0.10 | 0.38 |
|                  | SD           | 0.30  | 0.53   | 0.05 | 0.05  | 0.02   |      | 0.10  | 0.00 |      | 0.00 | 0.01 |
|                  | RSD          | 22.0  | 2.8    | 0.8  | 0.9   | 7.3    |      | 0.7   | 14.7 |      | 3.4  | 1.5  |
|                  | P            | 43.9  | 5.6    | 1.7  | 1.7   | 14.7   |      | 1.4   | 29.3 |      | 6.8  | 3.1  |
| UMI-07-054       | Average conc | 1.40  | 16.56  | 0.00 | 9.99  | 0.86   | 0.08 | 12.85 | <DL  | 0.04 | <DL  | 0.02 |
|                  | SD           | 0.12  | 0.75   |      | 0.10  | 0.03   | 0.01 | 0.19  |      | 0.00 |      | 0.00 |
|                  | RSD          | 8.2   | 4.5    |      | 1.0   | 3.3    | 6.8  | 1.5   |      | 10.1 |      | 7.8  |
|                  | P            | 16.5  | 9.1    |      | 2.1   | 6.5    | 13.5 | 2.9   |      | 20.2 |      | 15.6 |
| MID024           | Average conc | 0.84  | 13.45  | 2.79 | 7.45  | 0.12   | 0.22 | 11.38 | 0.02 | 1.16 | 0.07 | 0.01 |
|                  | SD           | 0.24  | 0.12   | 0.06 | 0.07  | 0.01   | 0.01 | 0.11  | 0.00 | 0.02 | 0.00 | 0.00 |
|                  | RSD          | 28.9  | 0.9    | 2.1  | 0.9   | 9.8    | 5.3  | 0.9   | 14.0 | 1.4  | 6.8  | 11.1 |
|                  | P            | 57.8  | 1.7    | 4.3  | 1.8   | 19.5   | 10.5 | 1.9   | 28.1 | 2.7  | 13.5 | 22.3 |
| DRD102           | Average conc |       | 18.49  | 0.04 | 10.06 | 0.43   | 0.03 | 7.85  | <DL  | <DL  | <DL  | 0.02 |
|                  | SD           |       | 0.41   |      | 0.11  | 0.01   | 0.00 | 0.10  |      |      |      | 0.00 |
|                  | RSD          |       | 2.2    |      | 1.1   | 3.4    | 11.9 | 1.3   |      |      |      | 6.9  |
|                  | P            |       | 4.4    |      | 2.3   | 6.8    | 23.7 | 2.5   |      |      |      | 13.8 |
| MID046           | Average conc | 0.00  | 30.23  | 4.47 | 1.60  | 0.28   | 0.01 | 7.60  | 0.01 | <DL  | 0.08 | 0.20 |
|                  | SD           |       | 0.44   | 0.04 | 0.02  | 0.02   |      | 0.08  | 0.00 |      | 0.00 | 0.00 |
|                  | RSD          |       | 1.5    | 0.9  | 1.2   | 8.2    |      | 1.0   | 12.8 |      | 3.2  | 1.8  |
|                  | P            |       | 2.9    | 1.7  | 2.4   | 16.3   |      | 2.0   | 25.7 |      | 6.5  | 3.7  |

---

| <u>Zr</u> |
|-----------|
| 32        |
| 1         |
| 2.7       |
| 5.4       |
| 82        |
| 2         |
| 2.9       |
| 5.8       |
| 73        |
| 2         |
| 3.0       |
| 6.0       |
| 9         |
| 1         |
| 7.4       |
| 14.8      |
| 39        |
| 2         |
| 4.7       |
| 9.4       |
| 129       |
| 1         |
| 0.8       |
| 1.5       |

---

---
