# Supplementary material
Source: publisher figshare collection journal article supplement (https://geolsoc.figshare.com/articles/dataset/_/3453602)
Supplement: Supplementary file 3 [file 1]

| Trace mode - ppm |              |       |       |       |        |        |       |       |        |        |        |         |       |
|------------------|--------------|-------|-------|-------|--------|--------|-------|-------|--------|--------|--------|---------|-------|
|                  |              | S     | Ca    | Ti    | Cr     | Fe     | Co    | Ni    | Cu     | Zn     | As     | Sr      | Zr    |
| DRD102           | Average conc | 841   | 76663 | 4167  | 346    | 54664  | 28    | <DL   | 73     | 70     | 37     | 92      | 41    |
|                  | SD           | 111   | 530   | 49    | 7      | 322    | 1     |       | 3      | 3      | 1      | 1       | 1     |
|                  | RSD          | 13.2  | 0.7   | 1.2   | 2.0    | 0.6    | 4.3   |       | 4.7    | 4.4    | 3.3    | 1.5     | 3.1   |
|                  | P            | 26.5  | 1.4   | 2.3   | 3.9    | 1.2    | 8.6   |       | 9.3    | 8.7    | 6.7    | 2.9     | 6.2   |
| MID024           | Average conc | 2382  | 41910 | 1517  | 2370   | 109625 | 55    | 3665  | 146    | 97     | 163    | 5       | 12    |
|                  | SD           | 180   | 306   | 36    | 19     | 617    | 2     | 44    | 6      | 4      | 2      | 1       | 1     |
|                  | RSD          | 7.5   | 0.7   | 2.4   | 0.8    | 0.6    | 3.0   | 1.2   | 4.0    | 3.7    | 1.2    | 18.2    | 7.6   |
|                  | P            | 15.1  | 1.5   | 4.8   | 1.6    | 1.1    | 6.0   | 2.4   | 8.0    | 7.4    | 2.4    | 36.5    | 15.2  |
| MID046           | Average conc | 7935  | 5631  | 3119  | 124    | 27811  | 19    | <DL   | 126    | 478    | 14     | 27      | 135   |
|                  | SD           | 179   | 78    | 23    | 5      | 102    | 1     |       | 2      | 3      | 1      | 1       | 2     |
|                  | RSD          | 2.3   | 1.4   | 0.7   | 3.8    | 0.4    | 3.8   |       | 1.8    | 0.7    | 9.7    | 3.9     | 1.1   |
|                  | P            | 4.5   | 2.8   | 1.5   | 7.6    | 0.7    | 7.7   |       | 3.6    | 1.4    | 19.5   | 7.8     | 2.3   |
| Major mode - %   |              |       |       |       |        |        |       |       |        |        |        |         |       |
|                  |              | S     | Ca    | Ti    | Cr     | Fe     | Co    | Ni    | Cu     | Zn     | As     | Zr      | Si    |
| DRD102           | Average conc | 0.13  | 7.41  | 0.46  | <DL    | 5.55   | <DL   | 0.008 | 0.0081 | 0.0069 | 0.0011 | 0.0016  | 27.78 |
|                  | SD           | 0.01  | 0.05  | 0.02  |        | 0.05   |       | 0.001 | 0.0009 | 0.0006 | 0.0001 | 0.0001  | 0.12  |
|                  | RSD          | 8.76  | 0.62  | 3.93  |        | 0.85   |       | 18.60 | 10.98  | 8.30   | 4.69   | 4.65    | 0.45  |
|                  | P            | 17.52 | 1.24  | 7.86  |        | 1.70   |       | 37.19 | 21.97  | 16.60  | 9.39   | 9.29    | 0.90  |
| MID024           | Average conc | 0.44  | 3.91  | 0.15  | 0.248  | 9.35   | <DL   | 0.29  | 0.016  | 0.0108 | 0.0054 | 0.0003  | 21.39 |
|                  | SD           | 0.01  | 0.04  | 0.01  | 0.004  | 0.11   |       | 0.01  | 0.001  | 0.0007 | 0.0002 | 0.00005 | 0.21  |
|                  | RSD          | 3.14  | 1.14  | 8.56  | 1.57   | 1.18   |       | 2.41  | 6.78   | 6.65   | 3.09   | 15.26   | 0.97  |
|                  | P            | 6.28  | 2.28  | 17.12 | 3.14   | 2.36   |       | 4.83  | 13.56  | 13.31  | 6.18   | 30.52   | 1.95  |
| MID046           | Average conc | 2.41  | 0.46  | 0.33  | 0.01   | 3.48   | 0.007 | <DL   | 0.014  | 0.053  | 0.0005 | 0.0037  | 37.64 |
|                  | SD           | 0.03  | 0.01  | 0.03  | 0.01   | 0.04   | 0.001 |       | 0.001  | 0.001  | 0.0002 | 0.0001  | 0.25  |
|                  | RSD          | 1.13  | 1.33  | 7.76  | 95.48  | 1.08   | 15.28 |       | 7.19   | 2.78   | 31.35  | 2.09    | 0.65  |
|                  | P            | 2.26  | 2.66  | 15.52 | 190.96 | 2.17   | 30.56 |       | 14.38  | 5.57   | 62.70  | 4.19    | 1.31  |
